# The Potential Impact of Intensified Community Hand Hygiene Interventions on Respiratory tract Infections: A Modelling Study

Thi Mui Pham<sup>1,\*</sup>, Yin Mo<sup>2,3,4,5</sup>, Ben S. Cooper<sup>2,3</sup>

<sup>1</sup> Julius Center for Health Sciences and Primary Care of the UMC Utrecht, Utrecht University, Utrecht, The Netherlands;

<sup>2</sup> Centre for Tropical Medicine and Global Health, Nuffield Department of Medicine, University of Oxford, Oxford, United Kingdom;

<sup>3</sup> Mahidol-Oxford Tropical Medicine Research Unit, Mahidol University, Bangkok, Thailand;

<sup>4</sup> Division of Infectious Diseases, Department of Medicine, National University Hospital, Singapore;

<sup>5</sup> Department of Medicine, National University of Singapore, Singapore

\* [t.m.pham-2@umcutrecht.nl](mailto:t.m.pham-2@umcutrecht.nl)

## Abstract

Increased hand hygiene amongst the general public has been widely promoted as one of the most important non-pharmaceutical interventions for reducing transmission during the ongoing COVID-19 pandemic and is likely to continue to play a key role in long-term efforts to suppress transmission before a vaccine can be deployed. For other respiratory tract infections community hand hygiene interventions are supported by evidence from randomised trials, but information on how effectiveness in reducing transmission scales with achieved changes in hand hygiene behaviour is lacking. This information is of critical importance when considering the potential value of substantially enhancing community hand hygiene frequency to help suppress COVID-19. Here, we developed a simple model-based framework for understanding the key determinants of the effectiveness of changes in hand hygiene behaviour in reducing transmission and use it to explore the potential impact of interventions aimed at achieving large-scale population-wide changes in hand hygiene behaviour. Our analyses show that the effect of hand hygiene is highly dependent on the duration of viral persistence on hands and that hand washing needs to be performed very frequently or immediately after hand contamination events in order to substantially reduce the probability of infection. Hand washing at a lower frequency, such as every 30 minutes or with a delay of 15 minutes after contamination events, may be adequate to reduce the probability of infection when viral survival on hands is longer, such as when hands are contaminated with mucus. Immediate hand washing after contamination is more effective than hand washing at fixed-time intervals even when the total number of hand washing events is similar.

**NOTE: This preprint reports new research that has not been certified by peer review and should not be used to guide clinical practice.**

This event-prompted hand washing strategy is consistently more effective than fixed-time strategy regardless of hand contamination rates and should be highlighted in hand hygiene campaigns.

## 35 Introduction

36 Promotion of hand hygiene is a key public health intervention in preventing the spread of infectious  
37 diseases. Since the mid-1800s, when Ignaz Philip Semmelweis demonstrated that hand washing could  
38 dramatically reduce maternal mortality due to puerperal fever [1], hand hygiene has been the cornerstone  
39 of infection prevention and control policies. In the hospital setting, hand hygiene has played a major role  
40 in successfully controlling hospital-acquired infections, especially those caused by methicillin-resistant  
41 *Staphylococcus aureus* [2]. In the community, there is evidence from randomised controlled trials that  
42 hand hygiene interventions can be effective in reducing both the risk of diarrhoeal disease [3] and respi-  
43 ratory infections [4, 5, 6].

44  
45 In response to the coronavirus disease 2019 (COVID-19) pandemic, hand hygiene has been re-emphasized  
46 as a primary focus in public information campaigns [7, 8, 9]. Hand hygiene is simple, low-cost, minimally  
47 disruptive and, when widely adopted, may lead to substantial population-level effects [5, 10]. While  
48 randomised controlled trials of hand hygiene interventions in the community provide evidence that such  
49 interventions are effective in reducing the incidence of respiratory tract infections, reported effect sizes  
50 are highly variable [4, 6]. It is unclear to what extent this variability is explained by success in achieving  
51 substantial changes in hand hygiene behaviour in these trials. Understanding how the effectiveness of  
52 hand hygiene in reducing transmission scales with hand hygiene frequency is important for assessing the  
53 potential contribution to COVID-19 suppression efforts of interventions that aim to achieve a large and  
54 sustained increase in community hand hygiene.

55  
56 At present, most public health agencies recommend washing hands "more often" than prior to the pan-  
57 demic, and after coughing or sneezing, but specific indications of precisely how frequently to wash hands  
58 are generally lacking (see Table 1). This lack of more specific recommendations reflects the lack of a  
59 quantitative understanding of how different levels of hand hygiene behaviour affect transmission risk.

60  
61 In this study, we take a theory-based approach and develop a simple mechanistic mathematical model to  
62 understand the relationships between the various components of respiratory tract infection transmission  
63 pathways involving hand contamination. Finally, we consider the implications of the outcomes of these  
64 analyses for the potential contribution of intensified community hand hygiene to the suppression of severe  
65 acute respiratory syndrome coronavirus 2 (SARS-CoV-2) and, more generally, for reducing respiratory  
66 tract infections with other pathogens.

## 68 Methods

### 69 Overview

70 We consider infections that are mediated by contaminated hands and initially neglect direct droplet or  
71 aerosol transmission. Hands are assumed to become contaminated with infectious material via contact

**Table 1.** Hand hygiene recommendations advised by major public health agencies.

| Organisation | Public health message                                                                                                                                                                                                                                          |                                                                                                                                                                                                                                                                                                                                                                                                                                          | Ref      |
|--------------|----------------------------------------------------------------------------------------------------------------------------------------------------------------------------------------------------------------------------------------------------------------|------------------------------------------------------------------------------------------------------------------------------------------------------------------------------------------------------------------------------------------------------------------------------------------------------------------------------------------------------------------------------------------------------------------------------------------|----------|
|              | General public                                                                                                                                                                                                                                                 | Households with suspected/ confirmed patients                                                                                                                                                                                                                                                                                                                                                                                            |          |
| WHO          | Regularly and thoroughly clean hands with alcohol-based hand rub or soap and water, especially after coughing or sneezing, when caring for the sick, before, during and after food preparation, before eating, after toilet use, when hands are visibly dirty. | Family members: Wash hands with soap and water regularly, especially after coughing or sneezing, before, during and after food preparation, before eating, after toilet use, before and after caring for ill persons and when hands are visibly dirty.<br>Patients: Wash hands immediately and thoroughly after coughing, sneezing, removing face mask. Stay in a separate room from other family members.                               | [11]     |
| ECDC         | Rigorous hand-washing with soap and water >20 seconds, or alcohol-based solutions, gels or tissues is recommended in all community settings in all possible scenarios, especially after coughing or sneezing, disposal of used tissues.                        | Family members: Wash hands frequently, especially after contact with the patient or with any surface frequently touched by the patient, e.g., before and after preparing food, before eating, after using the toilet, removing face mask/ gloves, handling waste.<br>Patients: Wash hands immediately and thoroughly after coughing, sneezing, removing face mask.                                                                       | [12, 13] |
| PHE          | Washing hands more often, especially after arriving at work or home, after blowing nose, coughing or sneezing, before eating or handling food.                                                                                                                 | Wash hands frequently with soap and water for 20 seconds or using hand sanitiser, especially after coughing/sneezing and disposal of used tissue.                                                                                                                                                                                                                                                                                        | [14, 15] |
| CDC          | Wash hands often with soap and water for >20 seconds especially after being in a public place, or after blowing nose, coughing, or sneezing.                                                                                                                   | Clean frequently touched surfaces and objects daily (e.g., tables, countertops, light switches, doorknobs, and cabinet handles) using a regular household detergent and water. Wash hands often with soap and water for >20 seconds or hand sanitizer, especially after going to the bathroom, before eating, and after blowing nose, coughing, or sneezing. Always wash your hands with soap and water if your hands are visibly dirty. | [16, 17] |

Abbreviations: WHO - World Health Organization; ECDC - European Centre for Disease Prevention and Control; PHE - Public Health England (UK); CDC - Centers for Disease Control and Prevention (US)

72 with contaminated surfaces or an infected person. In the absence of hand washing, hands do not remain contaminated indefinitely; instead, as has been shown experimentally, the probability of remaining contaminated and capable of transmitting infection declines over time (Figure 1, top panel) [18, 19]. If contaminated hands of a susceptible host make contact with the host's mucous membranes in the eyes, nose or mouth there is some probability of the host becoming infected. Effective hand washing interrupts this process by removing viable pathogens from the hands.

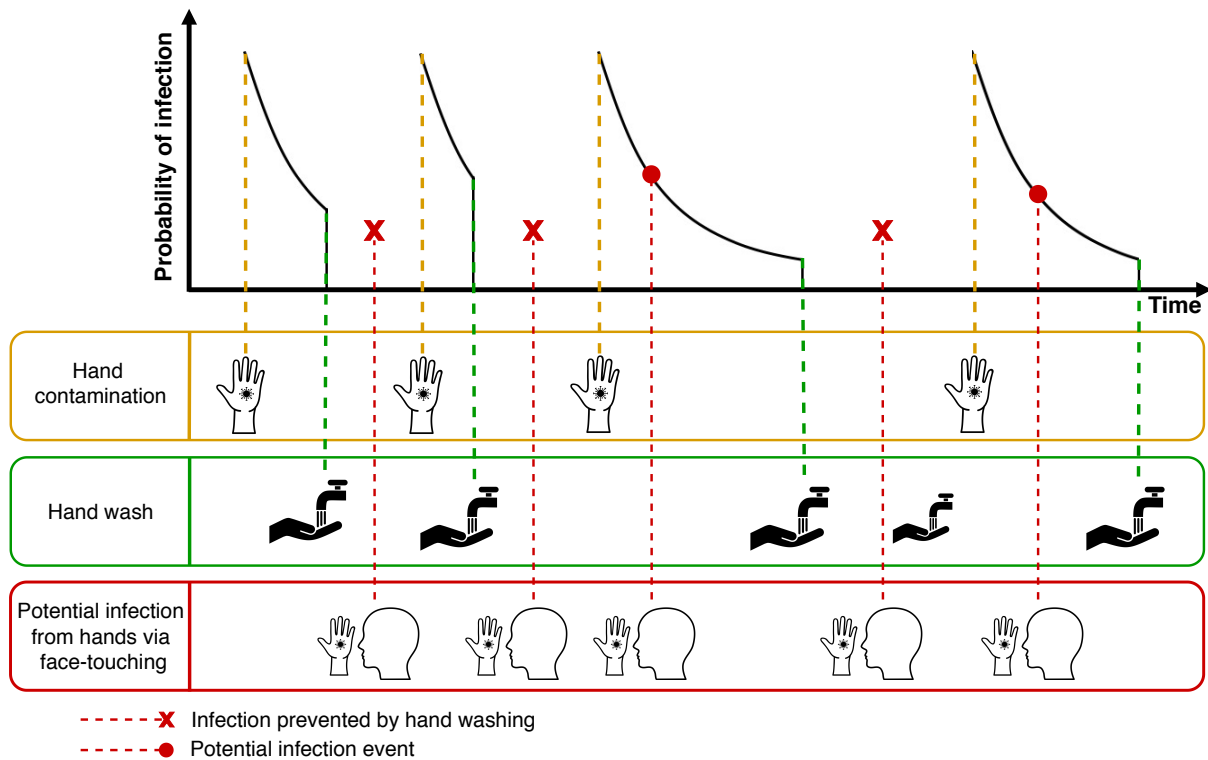

**Figure 1. Hand hygiene model.** Illustration of potential infection events from hands via face-touching, hand contamination events, and hand washing events. Hand contamination events increase the probability of infection, which then decreases exponentially with time. Hand washing eliminates the probability of infection during subsequent face-touching if no further hand contamination events occur. An infection may occur between a hand contamination event and hand washing, depending on the probability of infection at the time of face-touching.

78 An immediate consequence of this conceptualisation is that the time interval between the hands becoming  
79 contaminated and making infectious contact with the host's mucosa can have a critical impact on how  
80 effective a given frequency of hand washing will be at interrupting transmission (Figure 2). If this time  
81 interval is relatively long in the absence of hand hygiene, regular effective hand hygiene will have a  
82 high chance of blocking potential transmission events (red diamonds in Figure 2 panel A). In contrast,  
83 if this time interval is short much more frequent hand hygiene will be needed to block an appreciable  
84 proportion of transmission events (Figure 2 panel B). Given a certain probability of infection, the time  
85 interval between hand contamination and transmission to the host's mucosa tends to be longer if virus  
86 persistence on hands is long and vice versa.

## 87 Hand hygiene scenarios

88 We varied the timing of hand washing in the following schemes:

- 89 1. uniformly at fixed time intervals (fixed-time hand washing), or  
 90 2. with a delay after hand contamination events (event-prompted hand washing).

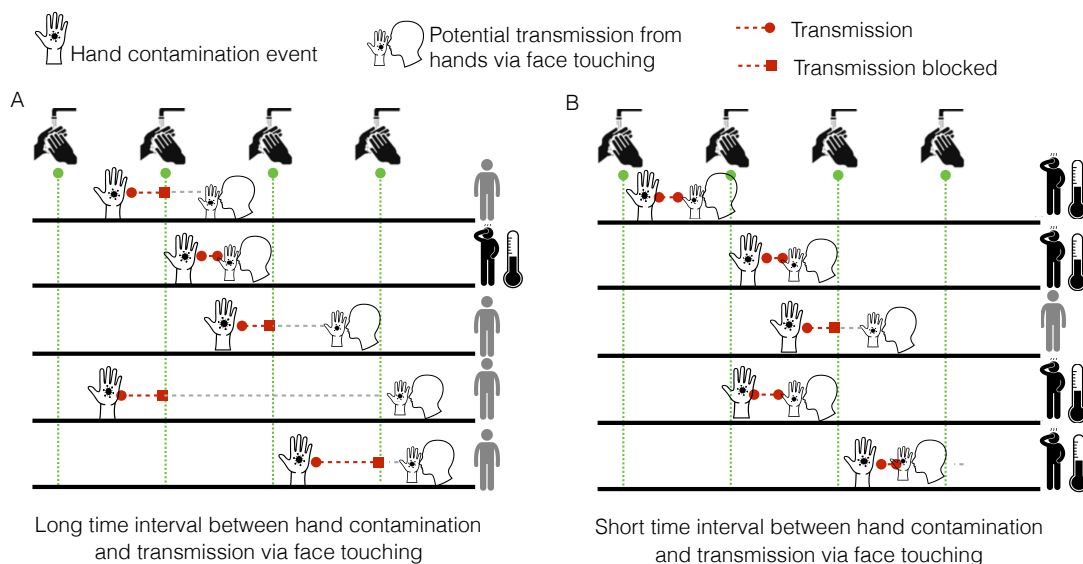

**Figure 2. Long versus short time interval between hand contamination and infection with regular hand washing.** A) When there are long time intervals between hand contamination and potential infection from hands via face-touching, hand washing can block many infection events and substantially reduce the risk of infection. B) When there are short time intervals between hand contamination and face-touching, it is likely that hand washing can disrupt only a few infections.

## 91 Mathematical model

Hands of susceptible individuals are assumed to become contaminated at random. These contamination events are assumed to occur independently of each other, and to follow a Poisson distribution with a mean of  $\lambda_c$  events per hour. The probability of the virus persisting on hands at time  $t$  after contamination,  $P(t)$ , is assumed to decay exponentially with a half-life of  $T_{1/2}$ . This is consistent with experimental data for influenza A (see [19]). Individuals touch their face at random leading to potential infection events that are assumed to occur independently of each other, and follow a Poisson distribution with a mean of  $\lambda_f$  events per hour. The probability that a single face-touching contact with contaminated hands actually leads to transmission is  $\epsilon$ .

Assume the face-touching events occur at times  $t_1, \dots, t_F$  during the given time period  $T$ . Then the cumulative probability of infection over the time period  $T$  is given by:

$$1 - e^{-\sum_{i=1}^F \epsilon P(t_i)}$$

92 We assume that when hand washing is performed after the last hand contamination event and before a  
93 face-touching event at time  $t_i$ , the respective probability of virus persistence  $P(t_i)$  is reduced to zero. We  
94 make the conservative assumption that hand washing by infectious individuals does not alter their chance  
95 of infecting others since infectious individuals may transmit the virus to others without direct physical  
96 contact. A detailed mathematical description of the model is included in the supplementary material.

## 97 Parameters

98 When available, parameter estimates were obtained from the literature. Otherwise, we performed sen-  
99 sitivity analyses where parameters were varied within plausible ranges (see Table 2). In the fixed-time  
100 hand washing scheme, we varied time intervals between hand washing to be 5 min to 6 hours. For event-  
101 prompted hand washing, the delay of hand washing after hand contamination events was varied from 1  
102 min to 6 hours.

103

104 There is little published data on the rate of hand contamination events susceptible individuals are exposed  
105 to when in contact with infected individuals who are shedding respiratory viruses, and none specific to  
106 SARS-CoV-2. In a direct observation study conducted by Zhang et al [20], surface touching behaviour  
107 in a graduate student office was recorded. Approximately 112 surface touches per hour were registered.  
108 Another study by Boone et al [21] found that the influenza virus was detected on 53% of commonly  
109 touched surfaces in homes with infected children. Informed by these values, we took 60 events per hour  
110 as the upper bound for the rate of hand contamination events  $\lambda_c$ . We chose 1 event per hour as the lower  
111 bound. In our main analyses, we used a rate of 4 hand contamination events per hour.

112

113 To date, it is not known how long SARS-CoV-2 can persist on human fingers. In [19], the survival  
114 of influenza A on human fingers was experimentally investigated. We fitted exponential decay curves  
115 to these results in order to determine the half-life of probability of persistence of H3N2 for two viral  
116 volumes of 2  $\mu\text{L}$  and 30  $\mu\text{L}$  (see Table 2 and supplementary material). In addition, we vary the half-life  
117 of probability of persistence from 1 to 60 min in our analysis.

## 118 Model outcomes

119 The model output is the cumulative probability of a susceptible person becoming infected in twelve hours  
120 and we will refer to it subsequently as simply the probability of infection. We investigated the impact  
121 of hand washing on the probability of infection for different hand contamination rates. In addition,  
122 we compared the two hand washing schemes (fixed-time vs. event-prompted) to find the optimal hand  
123 washing strategy that will lead to the greatest reduction of the probability of infection. The model  
124 was implemented in R version 3.6.3 [23]. The code reproducing the results of this study is available at  
125 [https://github.com/tm-pham/covid-19\\_handhygiene](https://github.com/tm-pham/covid-19_handhygiene).

**Table 2. Parameter values**

|                                                                      |             | Value                                            | Source   |
|----------------------------------------------------------------------|-------------|--------------------------------------------------|----------|
| <b>Fixed</b>                                                         |             |                                                  |          |
| Time period                                                          |             | 12 hours                                         | Assumed  |
| Rate of infection events through face-touching (per hour)            | $\lambda_f$ | 10                                               | [22]*    |
| Half-life of H3N2 persistence for 2 $\mu\text{L}$ of viral inoculum  |             | 5.4 min                                          | [19]     |
| Half-life of H3N2 persistence for 30 $\mu\text{L}$ of viral inoculum |             | 36.1 min                                         | [19]     |
| <b>Varied</b>                                                        |             |                                                  |          |
| Cumulative probability of infection (in 12 hours)                    |             | 10 % (30 %, 50 %)†                               |          |
| Rate of hand contamination events (per hour)                         | $\lambda_c$ | 4 hour <sup>-1</sup> (1–60 hour <sup>-1</sup> )† | [20, 21] |
| Time between hand washing events (fixed-time)                        | $t_F$       | 5, 15, 30 min, 1 hour, 2, 6 hours                |          |
| Delay of hand washing after hand contamination events                | $t_D$       | 1, 5, 15, 45 min, 1 hour, 2, 6 hours             |          |
| Half-life of viral persistence                                       | $T_{1/2}$   | 1–60 min                                         |          |

\* Mean face-touching frequency involving mucous membranes (eyes, mouth, nose)

† Sensitivity analyses

## Results

126 **Results**

127 Viral persistence on hands plays a key role on the effect of increasing hand hygiene frequency. The longer  
128 the virus survives on the hands, the larger the impact of increasing hand washing uptake on the probabil-  
129 ity of infection. For example, when the half-life of viral persistence is 1 min, hand washing every 15 min  
130 reduces the probability of infection from 10 % to 9.2 % (Figure 3 Panel A). When the half-lives increase to  
131 5.4 min and 36.1 min (equivalent to the half-lives of H3N2 persistence of 2  $\mu\text{L}$  and 30  $\mu\text{L}$  viral inoculum,  
132 respectively), the same hand washing frequency decreases the probability of infection to 6.9 % and to  
133 4.6 %, respectively. Consequently, fewer hand washes are necessary to reduce the probability of infection  
134 by 50 % for long compared to short durations of viral persistence (see Figure S2). This observation can be  
135 explained by the fact that the shorter the virus persists on hands, the shorter the intervals between hand  
136 contamination and transmission events tend to be (with a higher transmission probability per contact,  
137 see Figure S4) and therefore, the less likely hand washing is able to interrupt infection events. Figure S3  
138 shows that the total time of exposure between hand contamination and hand washes increases with in-  
139 creasing half-life of viral persistence, confirming the hypothesis that timely hand washing is especially  
140 crucial if the virus survives only a short time on fingers. Furthermore, the effect of hand washing on  
141 reducing the probability of infection plateaus with increasing duration of virus persistence (Figure 3).  
142 This can be attributed to the hand contamination rate, i.e. new events occur before the virus decays.

143

144 The second notable finding from the model is that event-prompted hand washing is more effective than  
145 fixed-time hand washing in reducing the probability of infection. We illustrate this in Figure 4 by com-  
146 paring both schemes using four different hand washing frequencies/delays, each with approximately the  
147 same average number of hand washing performed per hour. For example, hand washing regularly every  
148 fifteen minutes is compared to event-prompted hand washing one minute after each hand contamination  
149 event (set at four per hour). If the half-life of viral persistence is similar to 2  $\mu\text{L}$  of H3N2 inoculum

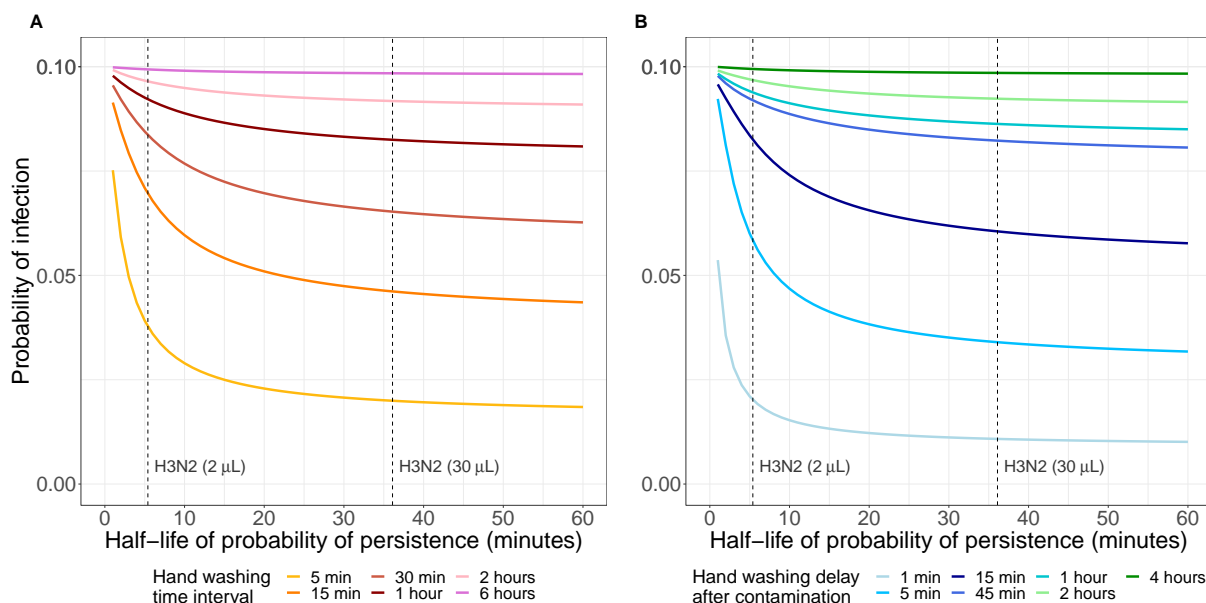

**Figure 3. Impact of half-life of viral persistence on probability of infection for different hand washing schemes and frequencies.** (A) Fixed-time hand washing (B) Event-prompted hand washing. In this graph, we assumed that a susceptible individual is exposed to a baseline probability of infection of 10% if no hand washing is performed within the time period of twelve hours. The dashed lines represent the half-life of viral persistence for H3N2 inoculum volumes of 2  $\mu$ L and 30  $\mu$ L (calculated from [19]). For each half-life value, the probability of transmission per face-touching event  $\epsilon$  was determined for a probability of infection = 10% in the case of no hand washing. The probability of infection for the different hand washing frequencies/delays was then computed using this  $\epsilon$  value. Hand contamination events are assumed to occur on average 4 times per hour. Sensitivity analyses with different values for baseline probabilities of infection as well as the half-life calculations are presented in the supplementary material.



150 ( $T_{1/2} = 5.4$  min), the baseline probability of infection of 10% (no hand washing) is reduced to about 6%  
 151 and 2% when hand washing is performed every 15 min and one minute after hand contamination events,  
 152 respectively. The differences between the two hand washing schemes are less pronounced if hand washing  
 153 is performed less frequently or with a longer delay after hand contamination events since the two hand  
 154 washing schemes become more similar. It follows that delays between hand contamination and hand  
 155 washing decrease the effect of hand washing on reducing the probability of infection.

156

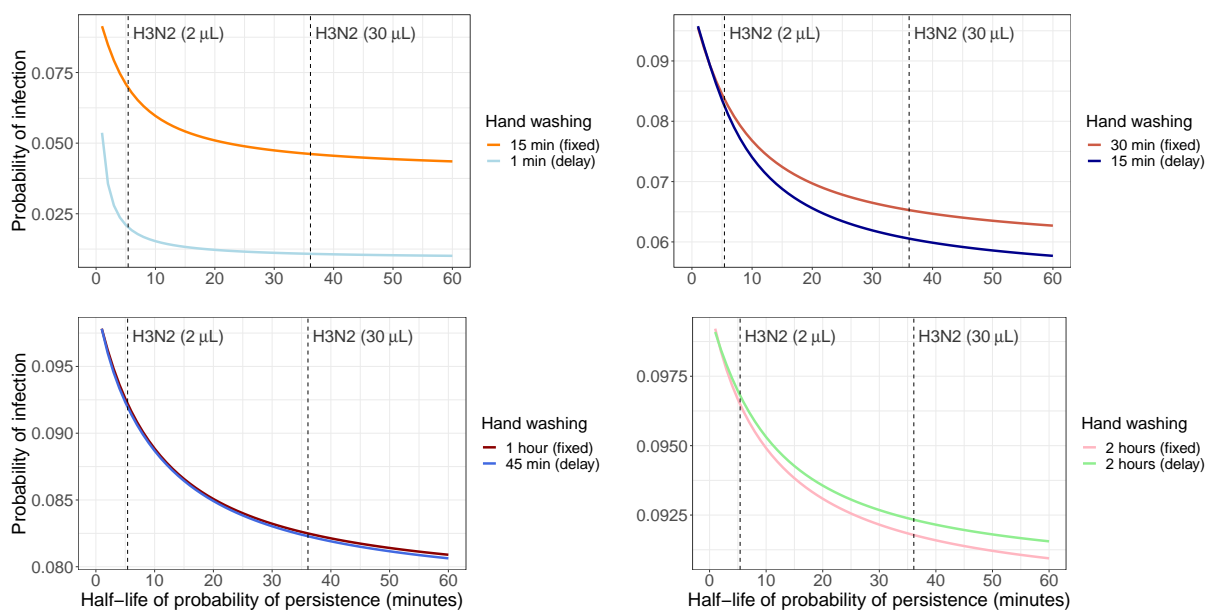

**Figure 4. Comparison of the impact of the two hand washing schemes on the cumulative probability of infection.** Hand washing at fixed time intervals and event-prompted hand washing with similar average number of hand washing events per hour are compared for a hand contamination rate of  $\lambda_c = 4$  hour<sup>-1</sup>. A baseline probability of infection of 10% is assumed when there is no hand washing. The dashed lines represent the half-life values of H3N2 persistence for 2  $\mu$ L and 30  $\mu$ L inoculum volumes [19].

157 Another important parameter that affects the effect of hand hygiene is the hand contamination rate.  
 158 Figure 5 shows the increase in hand hygiene frequency required to half the probability of infection from  
 159 10% (no hand wash) to 5%. When hand contamination rate is relatively rare, at less than 10 times per  
 160 hour, fewer hand washes are needed to reduce the probability of infection if hand washing is performed  
 161 event-prompted. In addition, the longer the virus persists on hands, the smaller the number of hand  
 162 washes have to be performed to reduce the probability of infection. This effect is less pronounced for  
 163 event-prompted than for time-fixed hand washing, re-emphasizing the finding that when hand contamina-  
 164 tion occurs very frequently, hand washing would need to be very frequent to have an impact on reducing  
 165 the probability of infection, e.g., at least five times per hour to prevent 50% of transmission (in the case  
 166 of a half-life of 36.1 min). In this case, susceptible individuals are exposed to a continuous risk of hand  
 167 contamination and hand washing has only a limited impact on reducing the risk of infection.

168

169 We performed sensitivity analyses for different baseline probabilities of infection and hand contamination

170 rates (see supplementary material). Our qualitative conclusions do not change with respect to different  
171 baseline probabilities of infection.

172

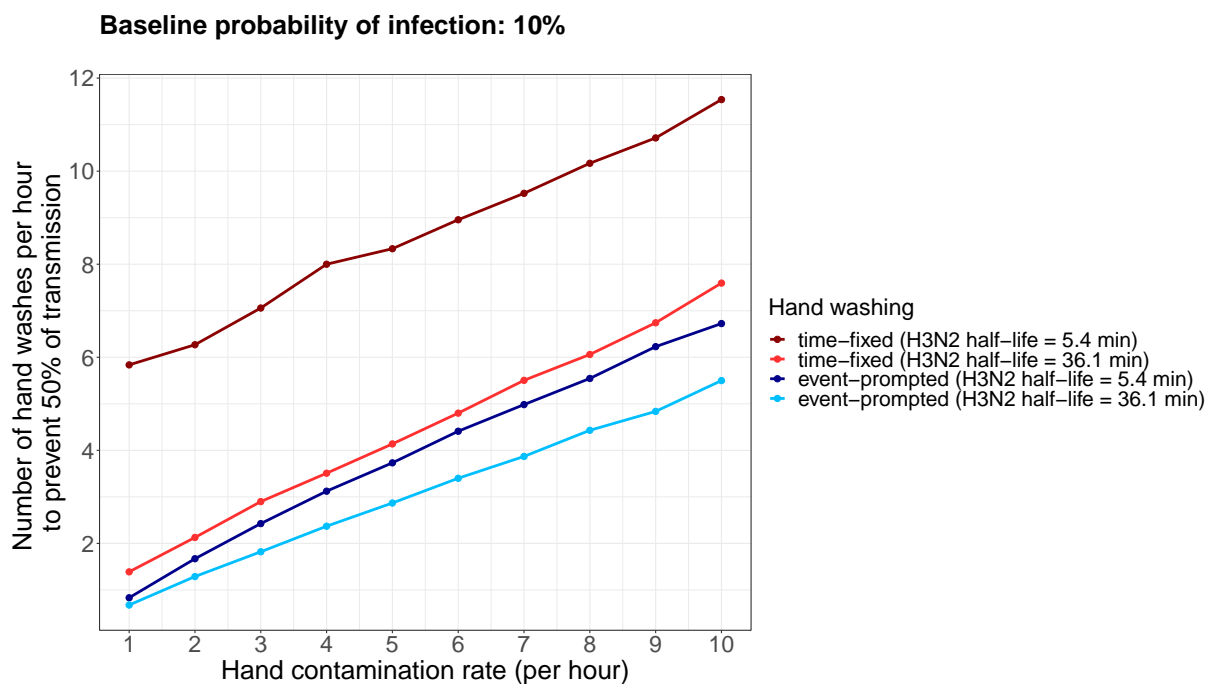

**Figure 5. Number of hand washes necessary to prevent 50% of transmission.** For a baseline probability of infection of 10%, the number of hand washing events necessary to reduce the probability of infection to 5% was computed for time-fixed and event-prompted hand washing and a range of hand contamination rates. We used the half-life of H3N2 persistence for viral inoculum volumes of 2  $\mu\text{L}$  and 30  $\mu\text{L}$  (calculated from [19]).

## 173 Discussion

174 Our study provides new insights into factors that affect the effectiveness of hand hygiene behaviour in  
175 reducing the probability of infection. Firstly, we found that the shorter the virus survives on hands, the  
176 less effective increasing hand hygiene frequency is in reducing infection. The logic behind this is that  
177 when the virus dies off quickly before hand washing is performed, the time intervals between hand con-  
178 tamination and transmission tend to be shorter and the respective transmission probability per contact  
179 tends to be higher for the same cumulative probability of infection. Secondly, contaminated surfaces are  
180 crucial for the effect of hand hygiene. The more often hands become contaminated, the more frequently  
181 hands need to be washed to reduce infection risk. Lastly, when hands are not constantly contaminated,  
182 event-prompted hand washing is more efficient than fixed-time hand washing given the same hand washing  
183 frequency. This is because delays in hand washing after contamination of hands in fixed-time compared  
184 to event-prompted hand washing tend to be longer, and, during this delay, susceptible hosts may become  
185 infected through face-touching.

186

187 These findings provide additional insights behind the modest and heterogeneous effects of hand hygiene

188 reported by hand hygiene trials aimed at reducing respiratory tract infections in the community [4, 6,  
189 24]. These trials are challenging to conduct due to the difficulties in implementing behaviour change,  
190 including poor adherence to hand washing recommendations [25], loss-to-follow up [26, 27], and external  
191 factors influencing behaviour such as the 2009 H1N1 outbreak [28].

192 Because the hand contamination rate directly impacts the effect of hand hygiene, specific hand hygiene  
193 advice should cater for different situations where surface contamination differs markedly. For example,  
194 contacts in the community and in a household with an infectious person would be likely to result in  
195 very different hand contamination rates. In the first case, where hand contamination events occur at a  
196 moderate rate, hand washing needs to be performed frequently or immediately after hand contamination  
197 events in order to substantially reduce the probability of infection. To facilitate this, hand sanitisers  
198 should ideally be installed or provided in public areas with high-touch surface areas, such as public trans-  
199 portation and supermarkets, to reduce the delay in hand cleansing. Although this has been recommended  
200 by the World Health Organization during the ongoing COVID-19 pandemic [29], many national govern-  
201 ments have not prioritized the easy access to hand hygiene facilities. Furthermore, in the second case,  
202 where hands become contaminated very frequently, a substantial reduction in the probability of infection  
203 is unlikely to be attained unless hand washing frequency is increased drastically, i.e., every one to five  
204 minutes. Because hand washing at such a high rate is not practical, the recommendation in this scenario  
205 is to regularly clean the environment and/or isolate infected individuals to reduce hand contamination  
206 events.

207

208 Our model has several limitations. Firstly, we specifically modelled indirect transmission routes via hands  
209 and did not consider direct droplet and aerosol transmission. To date, there is little known about the  
210 relative importance of the various transmission routes of respiratory pathogens [30]. When other routes  
211 are considered, the effect of hand hygiene will be reduced. Secondly, there is limited literature on many  
212 parameters used in the model, which prevents us from making more precise quantitative conclusions.  
213 These include the probability of infection with contaminated hands, the survival of pathogens on con-  
214 taminated hands and infective dose. Furthermore, we modelled all infection events with the same rate  
215 of decay, i.e., the same probability of pathogen persistence on the hands. In reality, hand contamina-  
216 tion events are likely to be heterogeneous with small droplets persisting only a short amount of time  
217 and heavy contamination with mucus decaying at a slower rate. We performed sensitivity analyses with  
218 varying parameter values and distributions to ensure our conclusions are robust on a qualitative level.

219

## References

- [1] Mark Best and Duncan Neuhauser. “Ignaz Semmelweis and the birth of infection control”. In: *BMJ Quality & Safety* 13.3 (2004), pp. 233–234 (cit. on p. 2).
- [2] Didier Pittet and John M Boyce. “Hand hygiene and patient care: pursuing the Semmelweis legacy”. In: *The Lancet Infectious Diseases* 1 (2001), pp. 9–20 (cit. on p. 2).
- [3] Val Curtis and Sandy Cairncross. “Effect of washing hands with soap on diarrhoea risk in the community: a systematic review”. In: *The Lancet infectious diseases* 3.5 (2003), pp. 275–281 (cit. on p. 2).
- [4] Valerie WY Wong, Benjamin J Cowling, and Alison E Aiello. “Hand hygiene and risk of influenza virus infections in the community: a systematic review and meta-analysis”. In: *Epidemiology & Infection* 142.5 (2014), pp. 922–932 (cit. on pp. 2, 11).
- [5] Allison E Aiello et al. “Effect of hand hygiene on infectious disease risk in the community setting: a meta-analysis”. In: *American journal of public health* 98.8 (2008), pp. 1372–1381 (cit. on p. 2).
- [6] Charlotte Warren-Gash, Ellen Fragaszy, and Andrew C Hayward. “Hand hygiene to reduce community transmission of influenza and acute respiratory tract infection: a systematic review”. In: *Influenza and other respiratory viruses* 7.5 (2013), pp. 738–749 (cit. on pp. 2, 11).
- [7] *Coronavirus (COVID-19): How to stay safe on World Water Day*. Mar. 2020. URL: <https://www.worldwaterday.org/2020-home/share/covid-19-be-safe/> (cit. on p. 2).
- [8] *Public information campaign focuses on handwashing*. Mar. 2020. URL: <https://www.gov.uk/government/news/public-information-campaign-focuses-on-handwashing> (cit. on p. 2).
- [9] *How to Protect Yourself*. Mar. 2020. URL: <https://www.cdc.gov/coronavirus/2019-ncov/prevent-getting-sick/prevention.html> (cit. on p. 2).
- [10] Benjamin J Cowling et al. “Facemasks and hand hygiene to prevent influenza transmission in households: a cluster randomized trial”. In: *Annals of internal medicine* 151.7 (2009), pp. 437–446 (cit. on p. 2).
- [11] World Health Organisation. *Coronavirus disease (COVID-19) advice for the public*. en. Mar. 2020. URL: <https://www.who.int/emergencies/diseases/novel-coronavirus-2019/advice-for-public> (visited on 04/03/2020) (cit. on p. 3).
- [12] European Centre for Disease Prevention and Control. *Coronavirus disease 2019 (COVID-19) pandemic: increased transmission in the EU/EEA and the UK – seventh update*. English. Mar. 2020. URL: <https://www.ecdc.europa.eu/sites/default/files/documents/RRA-seventh-update-Outbreak-of-coronavirus-disease-COVID-19.pdf> (cit. on p. 3).
- [13] European Centre for Disease Prevention and Control. *Coronavirus disease 2019 (COVID-19) pandemic: increased transmission in the EU/EEA and the UK – seventh update*. English. Mar. 2020. URL: <https://www.ecdc.europa.eu/sites/default/files/documents/RRA-seventh-update-Outbreak-of-coronavirus-disease-COVID-19.pdf> (cit. on p. 3).

- 256 [14] UK Department of Health and Social Care. *Public information campaign focuses on handwashing*.  
257 English. Mar. 2020 (cit. on p. 3).
- 258 [15] Public Health England. *Stay at home: guidance for households with possible coronavirus (COVID-  
259 19) infection*. English. Mar. 2020. URL: [https://www.gov.uk/government/publications/covid-  
260 19-stay-at-home-guidance/stay-at-home-guidance-for-households-with-possible-  
261 coronavirus-covid-19-infection](https://www.gov.uk/government/publications/covid-19-stay-at-home-guidance/stay-at-home-guidance-for-households-with-possible-coronavirus-covid-19-infection) (cit. on p. 3).
- 262 [16] Division of Viral Diseases National Center for Immunization and Respiratory Diseases (NCIRD).  
263 *Coronavirus Disease 2019 (COVID-19) How to Protect Yourself & Others*. URL: [https://www.  
264 cdc.gov/coronavirus/2019-ncov/prevent-getting-sick/prevention.html?CDC\\_AA\\_refVal=  
265 https%3A%2F%2Fwww.cdc.gov%2Fcoronavirus%2F2019-ncov%2Fprepare%2Fprevention.html](https://www.cdc.gov/coronavirus/2019-ncov/prevent-getting-sick/prevention.html?CDC_AA_refVal=https%3A%2F%2Fwww.cdc.gov%2Fcoronavirus%2F2019-ncov%2Fprepare%2Fprevention.html)  
266 (cit. on p. 3).
- 267 [17] Division of Viral Diseases National Center for Immunization and Respiratory Diseases (NCIRD).  
268 *Coronavirus Disease 2019 (COVID-19) Get Your Home Ready Detailed Planning Guidance*. En-  
269 glish. Mar. 2020. URL: [https://www.cdc.gov/coronavirus/2019-ncov/daily-life-coping/  
270 get-your-household-ready-for-COVID-19.html](https://www.cdc.gov/coronavirus/2019-ncov/daily-life-coping/get-your-household-ready-for-COVID-19.html) (cit. on p. 3).
- 271 [18] B Bean et al. “Survival of influenza viruses on environmental surfaces”. In: *Journal of Infectious  
272 Diseases* 146.1 (1982), pp. 47–51 (cit. on p. 4).
- 273 [19] Y. Thomas et al. “Survival of influenza virus on human fingers”. In: *Clinical Microbiology and  
274 Infection* 20.1 (2014), O58–O64. ISSN: 1198-743X. DOI: [https://doi.org/10.1111/1469-0691.  
275 12324](https://doi.org/10.1111/1469-0691.12324). URL: <http://www.sciencedirect.com/science/article/pii/S1198743X14602196> (cit.  
276 on pp. 4–10, 15–17, 20–24).
- 277 [20] Nan Zhang and Yuguo Li. “Transmission of Influenza A in a Student Office Based on Realistic  
278 Person-to-Person Contact and Surface Touch Behaviour”. In: *International journal of environ-  
279 mental research and public health* 15.8 (Aug. 2018), p. 1699. ISSN: 1660-4601. DOI: [10.3390/  
280 ijerph15081699](https://pubmed.ncbi.nlm.nih.gov/30096894). URL: <https://pubmed.ncbi.nlm.nih.gov/30096894> (cit. on pp. 6, 7).
- 281 [21] Stephanie A. Boone and Charles P. Gerba. “The occurrence of influenza A virus on household and  
282 day care center fomites”. In: *Journal of Infection* 51.2 (2005), pp. 103–109. ISSN: 0163-4453. DOI:  
283 <https://doi.org/10.1016/j.jinf.2004.09.011>. URL: [http://www.sciencedirect.com/  
284 science/article/pii/S0163445304002336](http://www.sciencedirect.com/science/article/pii/S0163445304002336) (cit. on pp. 6, 7).
- 285 [22] Yen Lee Angela Kwok, Jan Gralton, and Mary-Louise McLaws. “Face touching: A frequent habit  
286 that has implications for hand hygiene”. In: *American Journal of Infection Control* 43.2 (Feb. 2015),  
287 pp. 112–114. ISSN: 0196-6553. DOI: [10.1016/j.ajic.2014.10.015](https://doi.org/10.1016/j.ajic.2014.10.015). URL: [https://doi.org/10.  
288 1016/j.ajic.2014.10.015](https://doi.org/10.1016/j.ajic.2014.10.015) (cit. on p. 7).
- 289 [23] R Core Team. *R: A Language and Environment for Statistical Computing*. R Foundation for Sta-  
290 tistical Computing. Vienna, Austria, 2020. URL: <https://www.R-project.org/> (cit. on p. 6).
- 291 [24] Micky Willmott et al. “Effectiveness of hand hygiene interventions in reducing illness absence among  
292 children in educational settings: a systematic review and meta-analysis”. In: *Archives of disease in  
293 childhood* 101.1 (2016), pp. 42–50 (cit. on p. 11).

- 294 [25] Thomas J Sandora et al. “A randomized, controlled trial of a multifaceted intervention including  
295 alcohol-based hand sanitizer and hand-hygiene education to reduce illness transmission in the home”.  
296 In: *Pediatrics* 116.3 (2005), pp. 587–594 (cit. on p. 11).
- 297 [26] Catherine G White et al. “Reduction of illness absenteeism in elementary schools using an alcohol-  
298 free instant hand sanitizer”. In: *The Journal of School Nursing* 17.5 (2001), pp. 248–265 (cit. on  
299 p. 11).
- 300 [27] TP Zomer et al. “A hand hygiene intervention to reduce infections in child daycare: a randomized  
301 controlled trial”. In: *Epidemiology & Infection* 143.12 (2015), pp. 2494–2502 (cit. on p. 11).
- 302 [28] Patricia Priest et al. “Hand sanitiser provision for reducing illness absences in primary school  
303 children: a cluster randomised trial”. In: *PLoS medicine* 11.8 (2014) (cit. on p. 11).
- 304 [29] World Health Organisation. *Interim recommendations on obligatory hand hygiene against trans-*  
305 *mission of COVID-19*. en. 2020. URL: [https://www.who.int/docs/default-source/inaugural-](https://www.who.int/docs/default-source/inaugural-who-partners-forum/who-interim-recommendation-on-obligatory-hand-hygiene-against-transmission-of-covid-19.pdf)  
306 [who-partners-forum/who-interim-recommendation-on-obligatory-hand-hygiene-against-](https://www.who.int/docs/default-source/inaugural-who-partners-forum/who-interim-recommendation-on-obligatory-hand-hygiene-against-transmission-of-covid-19.pdf)  
307 [transmission-of-covid-19.pdf](https://www.who.int/docs/default-source/inaugural-who-partners-forum/who-interim-recommendation-on-obligatory-hand-hygiene-against-transmission-of-covid-19.pdf) (visited on 04/01/2020) (cit. on p. 11).
- 308 [30] Jasmin S Kutter et al. “Transmission routes of respiratory viruses among humans”. In: *Current*  
309 *opinion in virology* 28 (2018), pp. 142–151 (cit. on p. 11).

## 310 Supplementary material

### 311 Model

Hands of susceptible individuals are assumed to get contaminated at random. These contamination events are assumed to occur independently of each other, and follow a Poisson distribution with a mean of  $\lambda_c$  events per hour. The probability of the virus to persist on hands at time  $t$  after contamination,  $P(t)$ , is assumed to decay exponentially with a half-life of  $T_{1/2}$ . This is consistent with experimental data for influenza A (see [19]). Individuals touch their face at random leading to potential infection events that are assumed to occur independently of each other, and follow a Poisson distribution with a mean of  $\lambda_f$  events per hour. The probability that a single face-touching contact with contaminated hands actually leads to transmission is  $\epsilon$ .

Assume the face-touching events occur at times  $t_1, \dots, t_F$  during the given time period  $T$ . Then the cumulative probability of infection over the time period  $T$  is given by:

$$1 - e^{-\sum_{i=1}^F \epsilon P(t_i)}$$

312 We assume that when hand washing is performed after the last hand contamination event and before a  
313 face-touching event at time  $t_i$ , the respective probability of virus persistence  $P(t_i)$  is reduced to zero.

### 314 Probability of viral persistence on contaminated hands

The decay of the probability of viral persistence on contaminated hands is modeled as an exponential decay with probability distribution:

$$f_{\text{decay}}(t) = \lambda_d e^{-\lambda_d t} \quad (1)$$

where  $\lambda_d$  is the decay constant. The probability that virus will die off within time  $t$  is given by the integral of the decay distribution function from 0 to  $t$ :

$$\int_0^t f_{\text{decay}}(t) = \int_0^t \lambda_d e^{-\lambda_d t}$$

The probability that the virus will persist at time  $t$  is one minus the probability that it will die off within the same period:

$$\begin{aligned} P(t) &= 1 - \int_0^t f_{\text{decay}}(t) \\ &= 1 - \int_0^t \lambda_d e^{-\lambda_d t} \\ &= e^{-\lambda_d t} \end{aligned}$$

The average survival time (or mean lifetime) is given by:

$$\tau = \frac{1}{\lambda_d} = \frac{T_{1/2}}{\ln 2} \quad (2)$$

## 315 Estimation of virus half-life

We estimated the half-life of viral survival on contaminated hands using experiments conducted by Thomas et al,[19] where  $2\ \mu\text{L}$  and  $30\ \mu\text{L}$  of influenza A (H3N2) viral suspension mixed with respiratory secretions were deposited on finger tips. The half-lives were calculated using data from both the  $2\ \mu\text{L}$  ([19] Figure 2) and  $30\ \mu\text{L}$  ([19] Figure 3) H3N2 viral inoculum experiments with an exponential decay model:

$$n(t) = n_0 \cdot e^{-\lambda_d t}$$

316 where  $\lambda_d$  is the decay rate. The decaying quantity,  $n(t)$ , represents the number of fingers with recoverable  
317 infectious viral particles and is assumed to have an initial value of  $n_0$  at time zero.

318

319 In the experiment with  $2\ \mu\text{L}$  inoculum, 18 contaminated fingers from six individuals were tested for the  
320 presence of infectious virus at 1, 3, 5, 15 and 30 min after initial contamination. Figure S1 depicts the  
321 data and the fitted curve for the  $2\ \mu\text{L}$  inoculum. The decay rate was estimated to be  $\lambda_d^{(1)} \approx 0.1279$ . The  
322 half-life is therefore given by  $T_{1/2}^{(1)} = \frac{\ln(2)}{\lambda_d^{(1)}} = 5.4$  min.

323

324 For  $30\ \mu\text{L}$  of viral inoculum, a total of 12 fingers were contaminated and the presence of H3N2 was tested  
325 after 15 min. We estimated the half-life by using these two data points (see Figure 3 in [19]). Thus,  
326  $\lambda_d^{(2)} = -\frac{\ln(9/12)}{15} \approx 0.0192$ . Therefore,  $T_{1/2}^{(2)} = \frac{\ln(2)}{\lambda_d^{(2)}} = 36.1$  min.



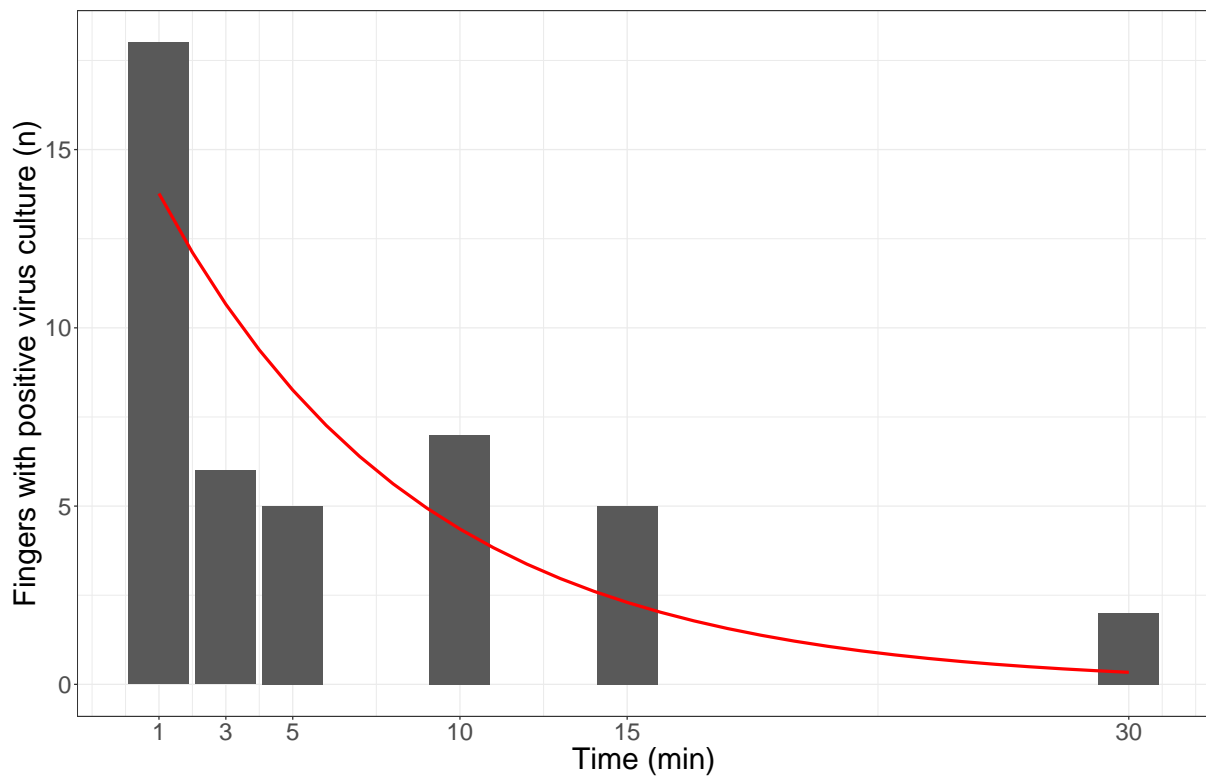

**Figure S1. Influenza A(H3N2) virus survival on fingers over time.** Data was retrieved from [19]. A  $2 \mu\text{L}$  drop of influenza A (H3N2) viral suspension mixed with respiratory secretions was deposited on fingertips. Bars represent the absolute number of fingers from which infectious virus was recovered. The red line represents the exponential decay curve  $n(t) = 15.65e^{-0.1279t}$  fitted to this data.

### 327 Hand washing and half-life of virus persistence

328 The shorter the half-life of virus persistence, the higher the frequency of hand washing necessary in order  
329 to prevent 50% of infections (see Figure S2). In addition, the time intervals between hand contamination  
and hand washes have to be shorter in order to prevent 50% of the infections (see Figure S3).

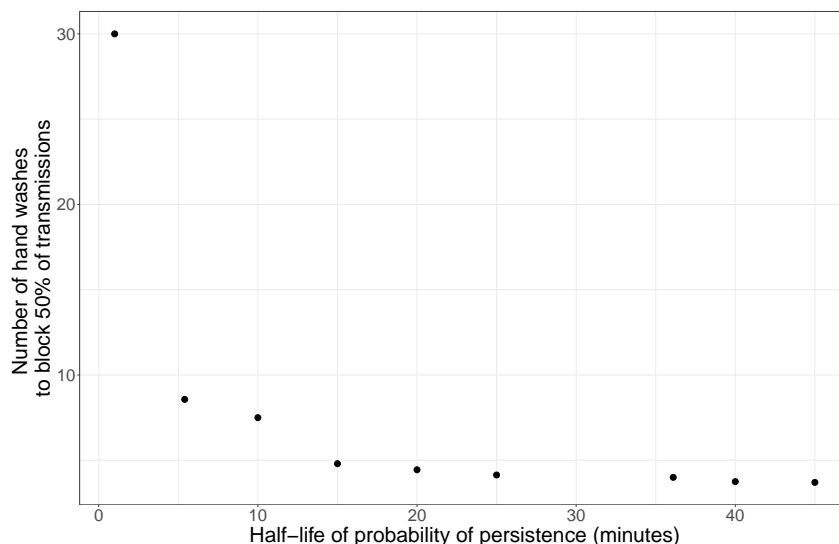

**Figure S2. Number of fixed-time hand washes necessary to prevent 50% of transmissions.**

For each half-life value of virus persistence, the number of hand washes that is necessary to prevent 50% of transmission was computed for a baseline probability of infection of 10%. Hand contamination events are assumed to occur on average 4 times per hour.

330

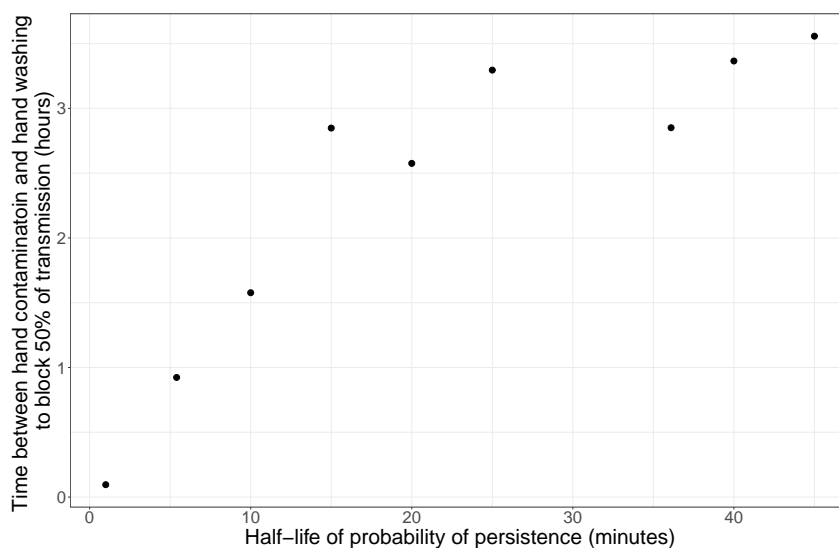

**Figure S3. Cumulative time between hand contamination events and fixed-time hand**

**washes to prevent 50% of transmissions.** For each half-life value of virus persistence, the cumulative time between hand contamination events and hand washes for preventing 50% of transmission was computed for a baseline probability of infection of 10%. Hand contamination events are assumed to occur on average 4 times per hour.

### 331 **Transmission probability per contact and half-life of virus persistence**

332 Figure S4 shows that the shorter the virus persists on hands, the higher the probability of transmission per face-touching contact has to be if the cumulative probability of infection is assumed to be fixed.

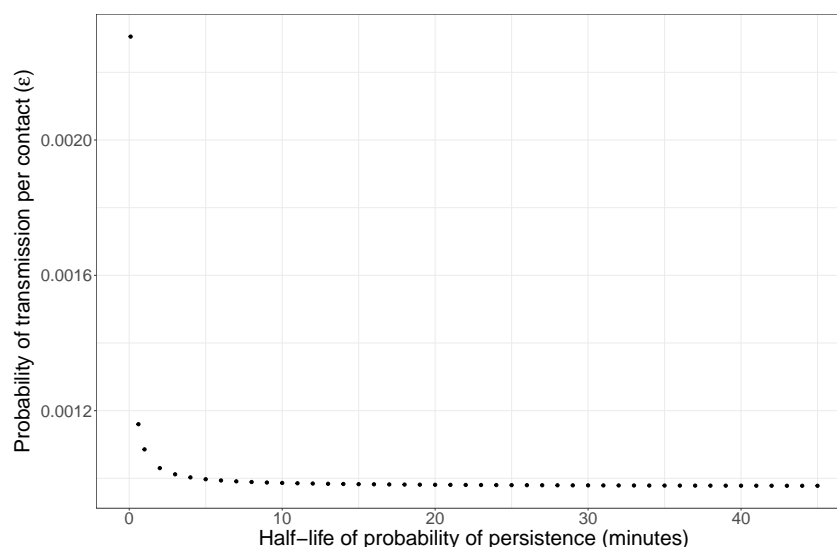

333 **Figure S4. Probability of transmission per face-touching contact for different half-lives of virus persistence.** For a baseline cumulative probability of infection of 10% and each half-life value of virus persistence, the probability of transmission per single face-touching contact was computed. Hand contamination events are assumed to occur on average 4 times per hour.

### 334 **Sensitivity analyses**

#### 335 **Cumulative probability of infection**

336 We performed sensitivity analyses for different probabilities of infection and present here the results for probability of infection = 30% and probability of infection = 50% (see Figure S5-S6).

337 Figure S7 shows the impact of hand contamination rate on the number of hand washes that are necessary to prevent 50% of transmissions. A baseline probability of infection of 30% was used.

#### 340 **Hand contamination event rate**

341 We performed sensitivity analyses for different rates of hand contamination events and present the results for hand contamination rates of 1, 10 and 60 times per hour. The less frequently hands get contaminated, the larger the impact of increasing hand washing frequencies or reducing the delay of hand washing after hand contamination events and the larger the impact of the half-life of the probability of persistence of the virus on the actual probability of infection reduction. Figure S8 shows the results for a hand contamination rate of  $\lambda_c = 1 \text{ hour}^{-1}$ . The conclusions drawn from the Results section are applicable in this scenario as well. Figure S9-S10 depict the results for a hand contamination rate of 10 and 60 times per hour, respectively. When hand contamination occurs very frequently, fixed-time and event-prompted hand washing have almost identical effects. For both hand washing schemes, increasing the hand washing uptake has only a small impact on the probability of infection unless hand washing is performed every 5

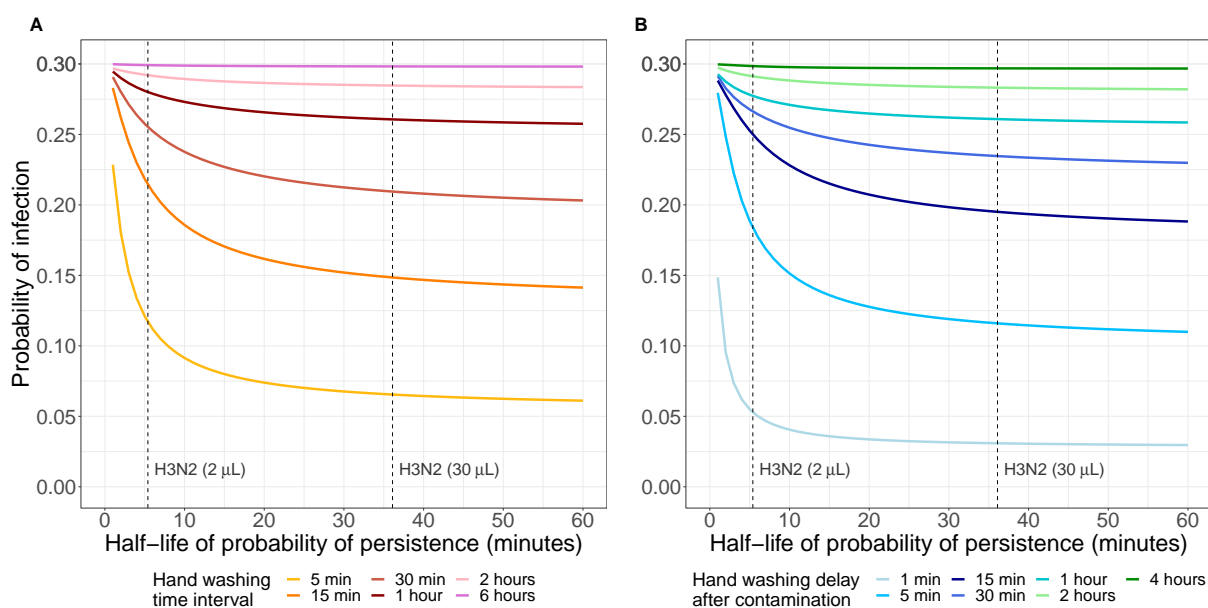

**Figure S5. Impact of half-life of probability of virus persistence on probability of infection for different hand washing schemes and frequencies.** (A) Fixed-time hand washing (B) Event-prompted hand washing. The dashed lines represent the half-life of probability of persistence for H3N2 for viral inoculum volumes of  $2 \mu\text{L}$  and  $30 \mu\text{L}$  (calculated from [19]). For each half-life value of the virus, the probability of transmission per face-touching event  $\epsilon$  was determined for a probability of infection = 30% in the case of no hand washing. The probability of infection for the different hand washing frequencies/delays was then computed using this  $\epsilon$  value. Hand contamination events are assumed to occur on average 4 times per hour.

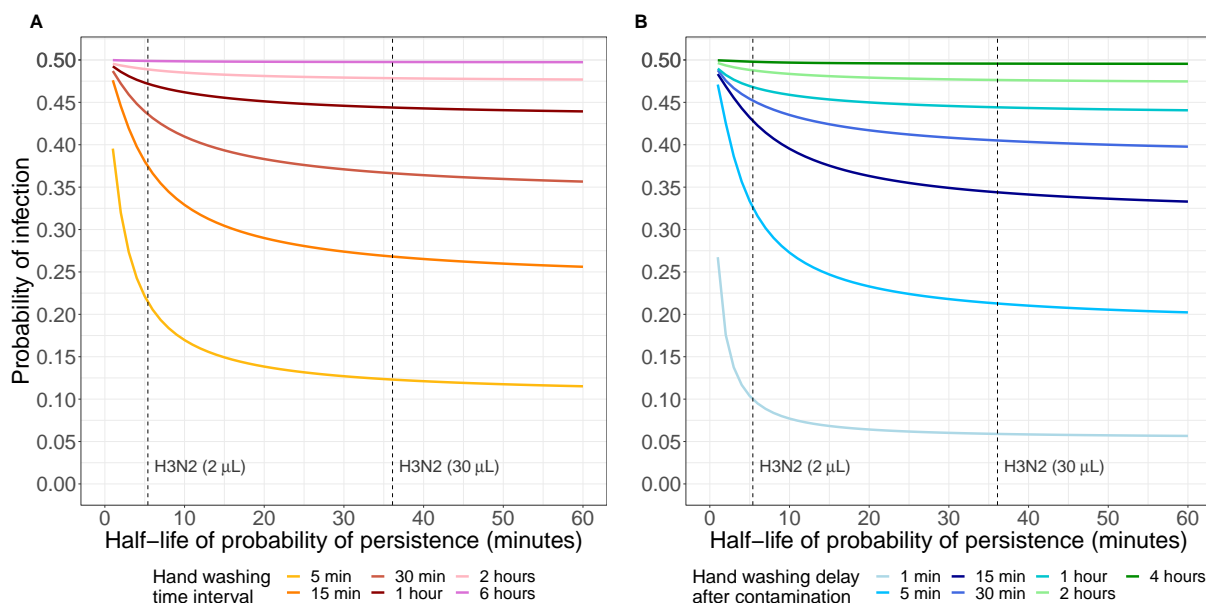

**Figure S6. Impact of half-life of probability of virus persistence on probability of infection for different hand washing schemes and frequencies.** (A) Fixed-time hand washing (B) Event-prompted hand washing. The dashed lines represent the half-life of probability of persistence for H3N2 for viral inoculum volumes of  $2 \mu\text{L}$  and  $30 \mu\text{L}$  (calculated from [19]). For each half-life value of the virus, the probability of transmission per face-touching event  $\epsilon$  was determined for a probability of infection = 50% in the case of no hand washing. The probability of infection for the different hand washing frequencies/delays was then computed using this  $\epsilon$  value. Hand contamination events are assumed to occur on average 4 times per hour.

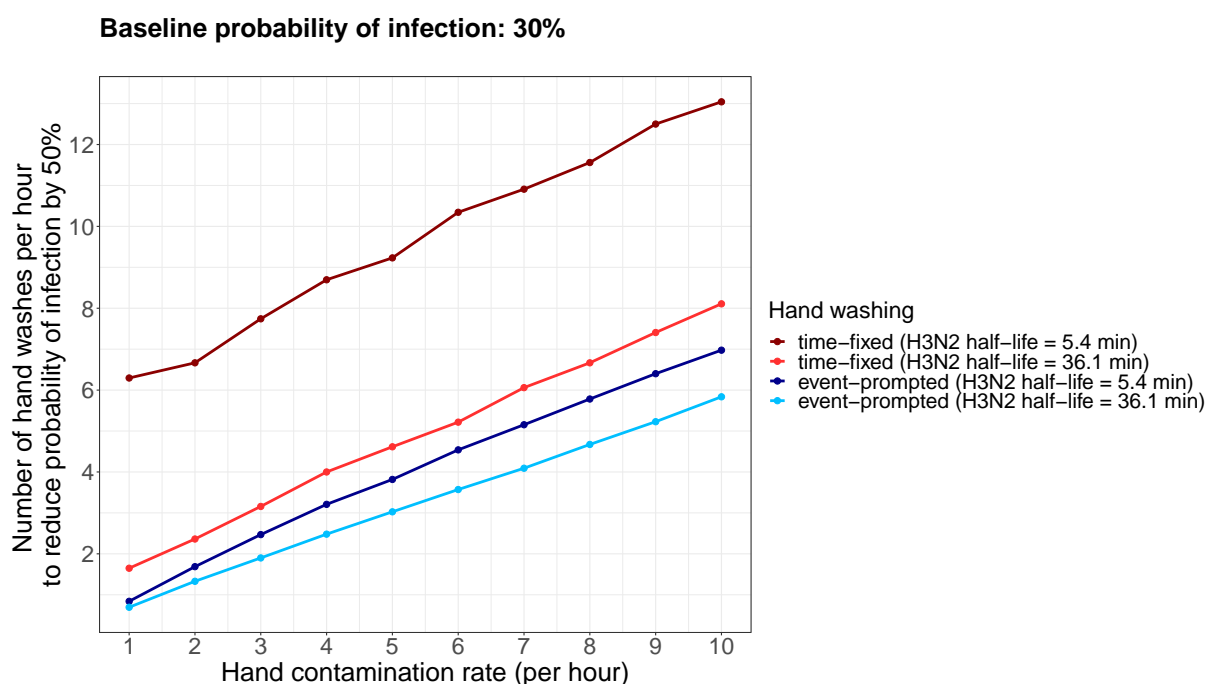

**Figure S7. Number of hand washes necessary to decrease the cumulative probability of infection by 50%.**

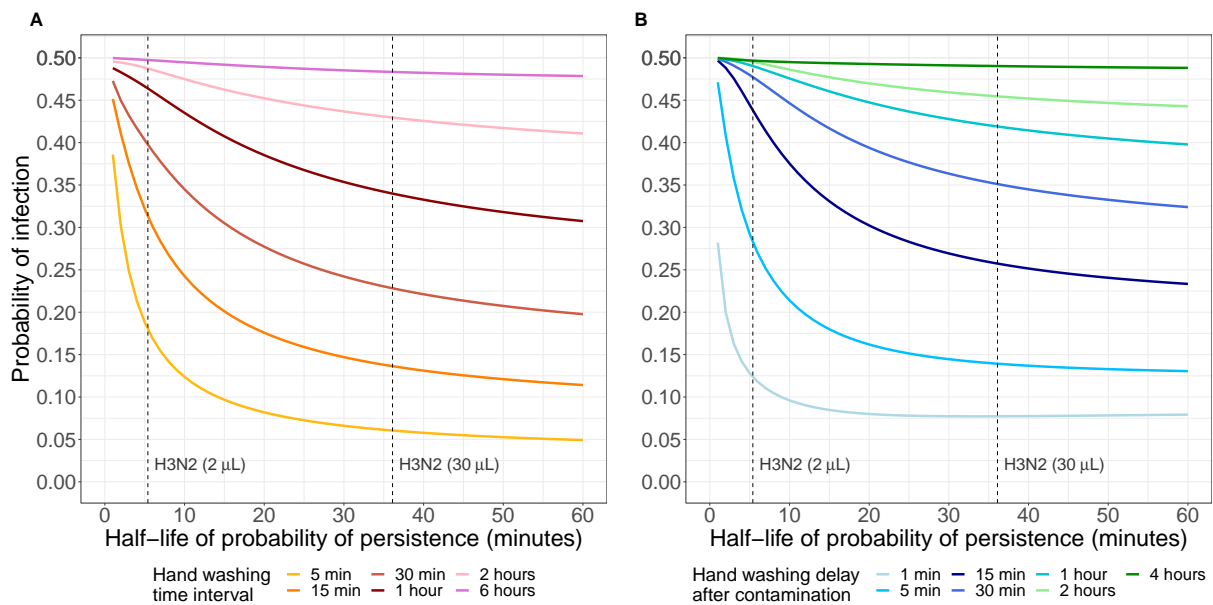

**Figure S8. Impact of half-life of probability of virus persistence on probability of infection for different hand washing schemes and frequencies.** (A) Fixed-time hand washing (B) Event-prompted hand washing. The dashed lines represent the half-life of probability of persistence for H3N2 for viral inoculum volumes of 2  $\mu\text{L}$  and 30  $\mu\text{L}$  (calculated from [19]). For each half-life value of the virus, the probability of transmission per face-touching event  $\epsilon$  was determined for a probability of infection = 30% in the case of no hand washing. The probability of infection for the different hand washing frequencies/delays was then computed using this  $\epsilon$  value. Hand contamination events are assumed to occur on average once per hour.

351 minutes or the time delay of hand washing after hand contamination events is decreased to one or five  
 352 minutes. However, due to the the high rate of hand contamination events of every 4 minutes or every  
 353 minute, respectively, such an uptake seems infeasible. Hence, when susceptible individuals are exposed  
 354 to continuous contamination, the best strategy would be to wash their hands as frequently as possible,  
 355 especially after touching potentially contaminated surfaces, and to reduce the rate of contamination by,  
 356 e.g., cleaning surfaces in their environment or isolating the infectious person.

357

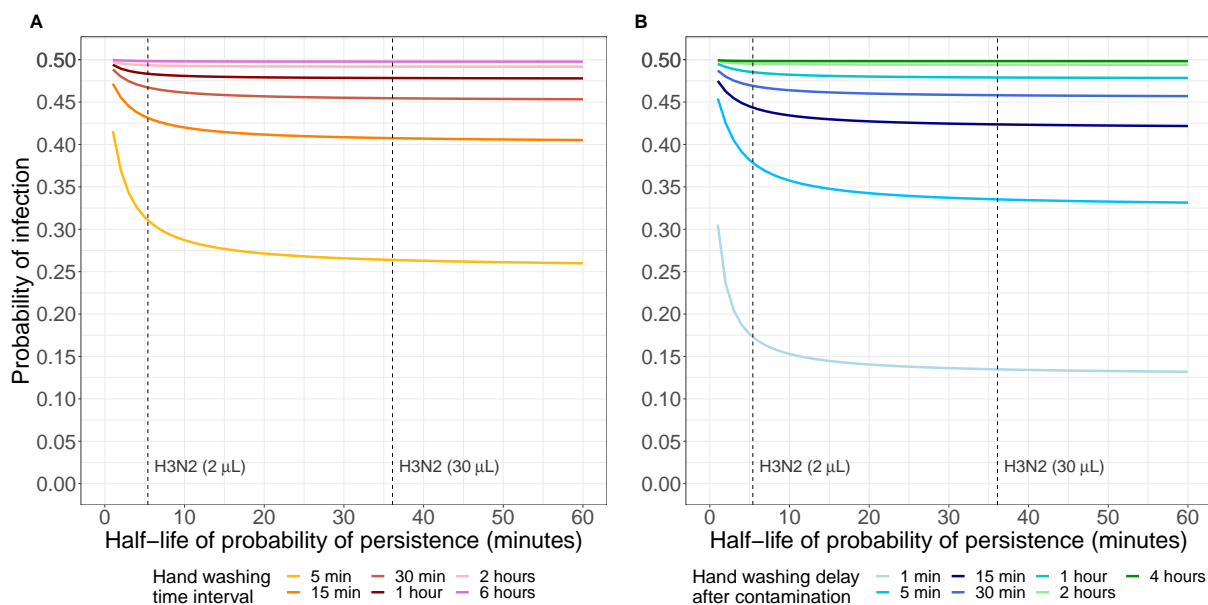

**Figure S9. Impact of half-life of probability of virus persistence on probability of infection for different hand washing schemes and frequencies.** (A) Fixed-time hand washing (B)

Event-prompted hand washing. The dashed lines represent the half-life of probability of persistence for H3N2 for viral inoculum volumes of  $2 \mu\text{L}$  and  $30 \mu\text{L}$  (calculated from [19]). For each half-life value of the virus, the probability of transmission per face-touching event  $\epsilon$  was determined for a probability of infection = 50% in the case of no hand washing. The probability of infection for the different hand washing frequencies/delays was then computed using this  $\epsilon$  value. Hand contamination events are assumed to occur on average 10 times per hour.

### 358 Comparison of number of hand washes

359 Figure S11 shows the average number of hand washes per hour for the two hand washing schemes in  
 360 the scenario used in the main analysis, i.e. for a hand contamination rate  $\lambda_c = 4 \text{ hour}^{-1}$ . For a fair  
 361 comparison between the two hand washing schemes, fixed-time hand washing should be compared to  
 362 event-prompted hand washing using approximately the same average number of hand washer per hour.  
 363 For example, hand washing every fifteen minutes may be compared to event-prompted hand washing one  
 364 minute after hand contamination.

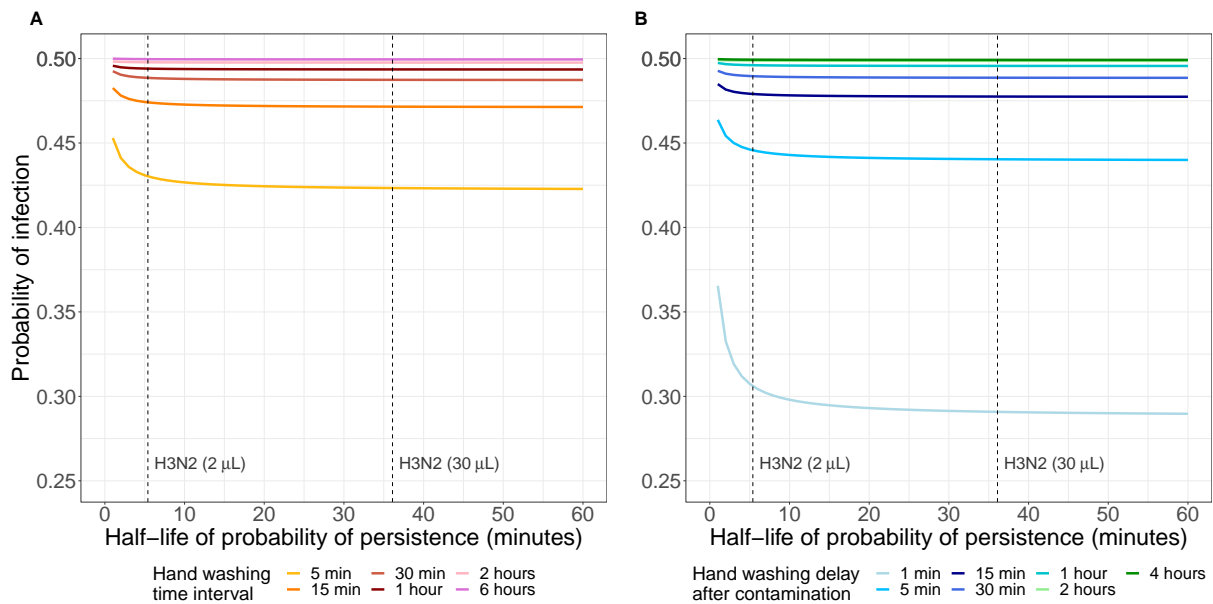

**Figure S10. Impact of half-life of probability of virus persistence on probability of infection for different hand washing schemes and frequencies.** (A) Fixed-time hand washing (B) Event-prompted hand washing. The dashed lines represent the half-life of probability of persistence for H3N2 for viral inoculum volumes of 2  $\mu\text{L}$  and 30  $\mu\text{L}$  (calculated from [19]). For each half-life value of the virus, the probability of transmission per face-touching event  $\epsilon$  was determined for a probability of infection = 50% in the case of no hand washing. The probability of infection for the different hand washing frequencies/delays was then computed using this  $\epsilon$  value. Hand contamination events are assumed to occur on average 60 times per hour.

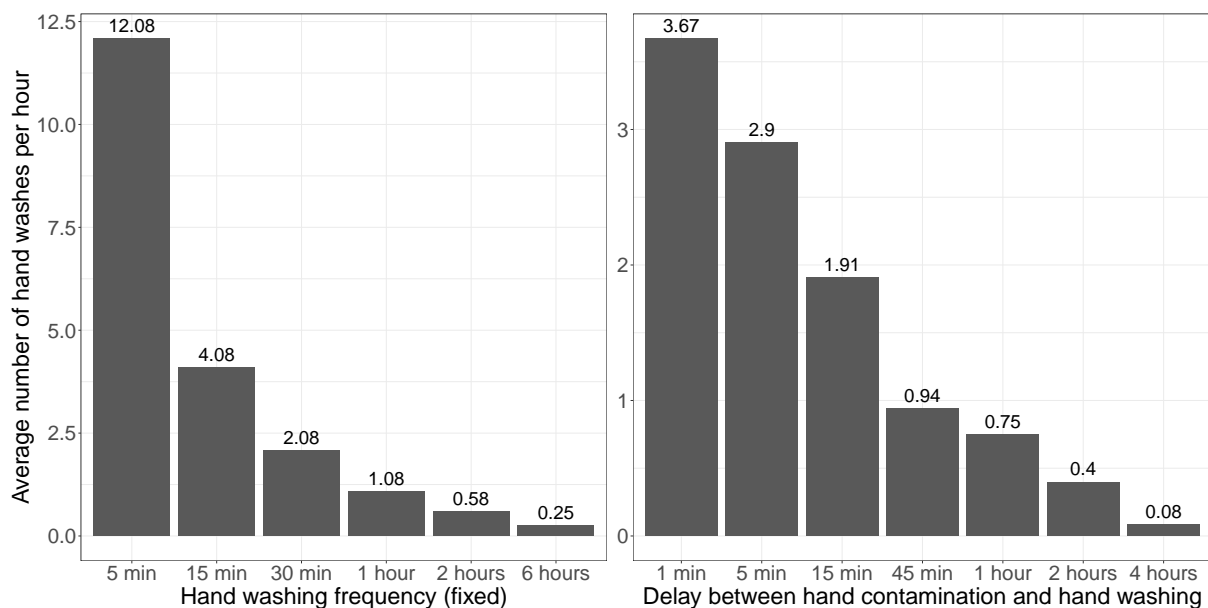

**Figure S11. Average number of hand washes per hour for fixed and delayed hand washing.** Hand contamination events are assumed to occur on average 4 times per hour.
